# Supplementary material for: Potassium Channels Kv1.3 and Kir2.1 But Not Kv1.5 Contribute to BV2 Cell Line and Primary Microglial Migration
Source: PubMed Central journal article supplement (PMC7923211; doi:10.3390/ijms22042081), 2021-02-19
Supplement: ijms-22-02081-s001.pdf [file ijms-22-02081-s001.pdf]

## Tables

**TABLE S1** siPOOL sequences containing the silencing RNA for the mouse gene ID #16518 coding for Kcnj2 (potassium inwardly-rectifying channel, subfamily J, member 2)

| Row | siPOOL  | Target NCBI Gene ID | Target symbol | Target species | siRNA number | Sense seq            | Antisense seq       |
|-----|---------|---------------------|---------------|----------------|--------------|----------------------|---------------------|
| 1   | Kcnj2-m | 16518               | Kcnj2         | mouse          | 1            | GCCGCTTTGTGAAGAAAGA  | TCTTCTTCACAAAGCGGC  |
| 2   | Kcnj2-m | 16518               | Kcnj2         | mouse          | 2            | GCACAGCTTCTCAAATCTA  | TAGATTTGAGAAGCTGTGC |
| 3   | Kcnj2-m | 16518               | Kcnj2         | mouse          | 3            | GGGAGTATATCCCTTTGGA  | TCCAAAGGGATATACTCCC |
| 4   | Kcnj2-m | 16518               | Kcnj2         | mouse          | 4            | GAGGCGACTGCCATGACAA  | TTGTCATGGCAGTCGCCTC |
| 5   | Kcnj2-m | 16518               | Kcnj2         | mouse          | 5            | GCATAGATCTCCACAACCA  | TGGTTGTGGAGATCTATGC |
| 6   | Kcnj2-m | 16518               | Kcnj2         | mouse          | 6            | GAGAGTGGGTAACCTTCGA  | TCGAAGGTTACCCACTCTC |
| 7   | Kcnj2-m | 16518               | Kcnj2         | mouse          | 7            | GTGACAGACGAGTGCCCAA  | TTGGGCACTCGTCTGTAC  |
| 8   | Kcnj2-m | 16518               | Kcnj2         | mouse          | 8            | GACTATTCAAGATTCCATA  | TATGGAATCTGAATAGTC  |
| 9   | Kcnj2-m | 16518               | Kcnj2         | mouse          | 9            | GTAAGTAATCAAACCAAA   | TTTGGTTTGATTACTTTAC |
| 10  | Kcnj2-m | 16518               | Kcnj2         | mouse          | 10           | GCACTGTAGTCATTTCTAA  | TTAGAAATGACTACAGTGC |
| 11  | Kcnj2-m | 16518               | Kcnj2         | mouse          | 11           | GCAATGTTTCAGTTTATCAA | TTGATAAACTGAACATTGC |
| 12  | Kcnj2-m | 16518               | Kcnj2         | mouse          | 12           | GGTATTTCTCTCTCTGTA   | TACAGAGAGAGAAATAACC |
| 13  | Kcnj2-m | 16518               | Kcnj2         | mouse          | 13           | CCAGAGACTTAGCAGAGAA  | TTCTCTGCTAAGTCTCTGG |
| 14  | Kcnj2-m | 16518               | Kcnj2         | mouse          | 14           | GGTATCCAGTCAATCGTA   | TACGATTGACTGGAATACC |
| 15  | Kcnj2-m | 16518               | Kcnj2         | mouse          | 15           | GCCAGTAATTTGTTTGCTA  | TAGCAAACAATTACTGGC  |
| 16  | Kcnj2-m | 16518               | Kcnj2         | mouse          | 16           | GACTTGAGTAAGCAGGACA  | TGTCCTGCTTACTCAAGTC |
| 17  | Kcnj2-m | 16518               | Kcnj2         | mouse          | 17           | GTGTGAGAACCAACCGCTA  | TAGCGGTTGGTTCTCACAC |
| 18  | Kcnj2-m | 16518               | Kcnj2         | mouse          | 18           | CTTTGAAATTGTTGCATA   | TATGACAACAATTTCAAAG |
| 19  | Kcnj2-m | 16518               | Kcnj2         | mouse          | 19           | CACTATCGTTCACGAAATA  | TATTTCGTGAACGATAGTG |
| 20  | Kcnj2-m | 16518               | Kcnj2         | mouse          | 20           | GCCGGTCTGTGGCTTGTGA  | TCACAAGCCACAGACCGGC |
| 21  | Kcnj2-m | 16518               | Kcnj2         | mouse          | 21           | GCCCAGGCCCTTAAGGCGA  | TCGCCTTAAGGGCCTGGGC |
| 22  | Kcnj2-m | 16518               | Kcnj2         | mouse          | 22           | CCATAAGACTTATGAAGTA  | TACTTCATAAGTCTTATGG |
| 23  | Kcnj2-m | 16518               | Kcnj2         | mouse          | 23           | GAGTGATTTAATGGCATA   | TATGCCATTAATCACTC   |
| 24  | Kcnj2-m | 16518               | Kcnj2         | mouse          | 24           | GAAGAGAAACACTACTATA  | TATAGTAGTGTCTCTCTC  |
| 25  | Kcnj2-m | 16518               | Kcnj2         | mouse          | 25           | GCGAAGATGGCAAAGCCAA  | TTGGCTTTGCCATCTTCGC |
| 26  | Kcnj2-m | 16518               | Kcnj2         | mouse          | 26           | GCAAAGCATGCGTGTGAGA  | TCTGACACGCATGCTTTGC |
| 27  | Kcnj2-m | 16518               | Kcnj2         | mouse          | 27           | GGGTCAACCGCTATGAGCCA | TGGCTCATAGCGGTGACCC |
| 28  | Kcnj2-m | 16518               | Kcnj2         | mouse          | 28           | GGGTCAATTGTCTTTGGAA  | TTCCAAGAGACAATGACCC |
| 29  | Kcnj2-m | 16518               | Kcnj2         | mouse          | 29           | GGGACAGAGGTACCTGGCA  | TGCCAGGTACCTCTGTCCC |
| 30  | Kcnj2-m | 16518               | Kcnj2         | mouse          | 30           | GCTAATAGTTATCTCAAA   | TTTGAGATAACCTATTAGC |

**TABLE S2** siPOOL sequences containing the silencing RNA for the mouse gene ID #16491 coding for Kcna3 (potassium voltage-gated channel, shaker-related subfamily, member 3)

| Row | siPOOL  | Target NCBI Gene ID | Target symbol | Target species | siRNA number | Sense seq            | Antisense seq        |
|-----|---------|---------------------|---------------|----------------|--------------|----------------------|----------------------|
| 1   | Kcna3-m | 16491               | Kcna3         | mouse          | 1            | GCTTCGACGCCATCCTCTA  | TAGAGGATGGCGTCSAAGC  |
| 2   | Kcna3-m | 16491               | Kcna3         | mouse          | 2            | CTCATCAAGGAAAGTACAA  | TTGTACTIONCTTGATGAG  |
| 3   | Kcna3-m | 16491               | Kcna3         | mouse          | 3            | CTCCGAAAAGCCCGGAGTA  | TACTCCGGGCTTTTCGGAG  |
| 4   | Kcna3-m | 16491               | Kcna3         | mouse          | 4            | GGTGGGCAGTAGTAACCAT  | ATGGTTACTACTGCCACC   |
| 5   | Kcna3-m | 16491               | Kcna3         | mouse          | 5            | CTGGCCATCCTGAGAGTCA  | TGACTCTCAGGATGGCCAG  |
| 6   | Kcna3-m | 16491               | Kcna3         | mouse          | 6            | GTGGAGACCTTGTGCATCA  | TGATGCACAAGGTCTCCAC  |
| 7   | Kcna3-m | 16491               | Kcna3         | mouse          | 7            | CGGTCAACGTGCCATCGA   | TCGATGGGCACGTTGACCG  |
| 8   | Kcna3-m | 16491               | Kcna3         | mouse          | 8            | CTGGCTGAACGACAAGGTA  | TACCTTGTCTTCAGCCAG   |
| 9   | Kcna3-m | 16491               | Kcna3         | mouse          | 9            | CCATGACAACCTGTTGGTTA | TAACCAACAGTTGTCATGG  |
| 10  | Kcna3-m | 16491               | Kcna3         | mouse          | 10           | CCGAGACACTGCTGGGCGA  | TCGCCAGCAGTGTCTCGG   |
| 11  | Kcna3-m | 16491               | Kcna3         | mouse          | 11           | GCTTGGAGACGCTTCCCGA  | TCGGGAAGCGTCTCCAAGC  |
| 12  | Kcna3-m | 16491               | Kcna3         | mouse          | 12           | GGTGAGGAGGCCATGGAAA  | TTTCCATGGCCTCCTCACC  |
| 13  | Kcna3-m | 16491               | Kcna3         | mouse          | 13           | GCTTTTACCAGCTGGGTGA  | TCACCCAGCTGGTAAAAGC  |
| 14  | Kcna3-m | 16491               | Kcna3         | mouse          | 14           | CCAAGCGGCGCATGCGGTA  | TACCGCATGCGCCGCTTGG  |
| 15  | Kcna3-m | 16491               | Kcna3         | mouse          | 15           | GCATTGCCAGTTCCTGTGA  | TCACAGGAACCTGGCAATGC |
| 16  | Kcna3-m | 16491               | Kcna3         | mouse          | 16           | GCCATCGCAGGTGTCTTGA  | TCAAGACACCTGCGATGGC  |
| 17  | Kcna3-m | 16491               | Kcna3         | mouse          | 17           | GCCACTTGCACCACGAACA  | TGTTCTGTTGGTCAAGTGGC |
| 18  | Kcna3-m | 16491               | Kcna3         | mouse          | 18           | CCCAGTTTTCGCGATGAGA  | TCTCATCGCGAAACTCGGG  |
| 19  | Kcna3-m | 16491               | Kcna3         | mouse          | 19           | CACAGCGCCTTCCCGCAGA  | TCTGCGGGAAGGCGCTGTG  |
| 20  | Kcna3-m | 16491               | Kcna3         | mouse          | 20           | GACCCCTCTTCGGGTTTTA  | TAAAACCCGAAGAAGGGTC  |
| 21  | Kcna3-m | 16491               | Kcna3         | mouse          | 21           | GTGTTTGAGGCTGCCAACA  | TGTTGGCAGCCTCAAACAC  |
| 22  | Kcna3-m | 16491               | Kcna3         | mouse          | 22           | GGTGATATGCACCCAGTGA  | TCACTGGGTGCATATCACC  |
| 23  | Kcna3-m | 16491               | Kcna3         | mouse          | 23           | GAGAGTCATCCGCCTAGTA  | TACTAGGCGGATGACTCTC  |
| 24  | Kcna3-m | 16491               | Kcna3         | mouse          | 24           | CGTCGCAGGACGTGTTTGA  | TCAAACACGTCTGCGACG   |
| 25  | Kcna3-m | 16491               | Kcna3         | mouse          | 25           | CCATGGAAAAGTTCCGTGA  | TCACGGAACTTTTCCATGG  |
| 26  | Kcna3-m | 16491               | Kcna3         | mouse          | 26           | CTGCAGATCCTAGGACAGA  | TCTGTCTTAGGATCTGCAG  |
| 27  | Kcna3-m | 16491               | Kcna3         | mouse          | 27           | CGGAGTAACTCCACTCTGA  | TCAGAGTGGAGTTACTCCG  |
| 28  | Kcna3-m | 16491               | Kcna3         | mouse          | 28           | CTGAGTAAAGTCGGAGTATA | TATACTCCGACTTACTCAG  |
| 29  | Kcna3-m | 16491               | Kcna3         | mouse          | 29           | GATATTCAGTGTCTTAA    | TTAGACATCAGTGAATATC  |
| 30  | Kcna3-m | 16491               | Kcna3         | mouse          | 30           | CCAGAAATATCATGAACTT  | AAGTTCATGATATTTCTGG  |
